# Supplementary material
Source: publisher site journal article supplement (https://www.spandidos-publications.com/1214/downloadSupplementary)
Supplement: Supplementary file [file downloadSupplementary]

Table SI. Basic information of the patients.

| Case no. | Age, years | Sex    | Stage    | Differentiation           |
|----------|------------|--------|----------|---------------------------|
| 1        | 66         | Male   | T3N2bM0  | Well-differentiated       |
| 2        | 73         | Male   | T2N0M0   | Well-differentiated       |
| 3        | 57         | Male   | T3N2bM0  | Moderately differentiated |
| 4        | 73         | Female | T2N2cM0  | Well-differentiated       |
| 5        | 67         | Female | TNM0     | Poorly differentiated     |
| 6        | 53         | Female | T4aN2cM0 | Poorly differentiated     |
| 7        | 62         | Female | TNM0     | Well-differentiated       |
| 8        | 59         | Male   | T3N0M0   | Well-differentiated       |
| 9        | 57         | Male   | T2NM0    | Moderately differentiated |
| 10       | 65         | Female | T1N2M0   | Well-differentiated       |
| 11       | 51         | Male   | T2N2bM0  | Well-differentiated       |
| 12       | 68         | Male   | T1N0M0   | Well-differentiated       |
| 13       | 53         | Female | T2N2bM0  | Well-differentiated       |
| 14       | 57         | Male   | T3N2bM0  | Well-differentiated       |
| 15       | 64         | Male   | T2N0M0   | Well-differentiated       |
| 16       | 70         | Male   | T3N2bM0  | Well-differentiated       |
| 17       | 52         | Male   | T2N0M0   | Well-differentiated       |
| 18       | 64         | Male   | T2N0M0   | Poorly differentiated     |
| 19       | 62         | Male   | T2N2cM0  | Well-differentiated       |
| 20       | 59         | Female | T3N2bM0  | Well-differentiated       |
